# Supplementary material
Source: ML conference proceedings conference paper supplement (https://proceedings.neurips.cc/paper_files/paper/2019/hash/3070e6addcd702cb58de5d7897bfdae1-Abstract.html)
Supplement: Supplementary file [file 3070e6addcd702cb58de5d7897bfdae1-Supplemental.zip]

---

# Supplementary material of “Balancing Efficiency and Fairness in On-Demand Ridesourcing”

---

Anonymous Author(s)

Affiliation

Address

email

## 1 Proof of Lemma 3.2

2 *Proof.* Based on the reassignment procedure described in REASSIGN, the vehicles  $\mathcal{V}$  can be divided  
 3 into several subsets  $\mathcal{S} = \{S_1, S_2, \dots, S_t\}$ , where  $S_i$  consists of all vehicles that participate in  
 4 the chain swapping (line 6-10 of REASSIGN) in one iteration. We assume  $\mathcal{S}$  is nonempty, since  
 5 otherwise we have  $M_{\text{new}} = M_{\text{old}}$ . Note that (1) if a vehicle  $v$  appears in  $S_i$  in some iteration, it will  
 6 be assigned to  $M_{\text{fair}}(v)$  after that iteration and will never appear again in  $S_j$  for any  $j > i$ . Hence  
 7 we have  $S_i \cap S_j = \emptyset$  for any  $i \neq j$ ; (2) there might be vehicles who do not participate in any  
 8 swapping procedure. Hence  $\bigcup_i S_i$  may not necessarily equal to  $\mathcal{V}$ . We define the set of vehicles  
 9  $\mathcal{V}_o = \mathcal{V} \setminus \bigcup_{1 \leq i \leq t} S_i$ . Note that  $\forall v \in \mathcal{V}_o, w_{v, M_{\text{new}}}(v) = w_{v, M_{\text{old}}}(v)$ .

10 We further define  $p_i = |S_i|$  and  $\mathcal{E}_i(M)$  as the *partial efficiency* of vehicles in  $S_i$  of the assignment  
 11  $M$ , i.e.  $\mathcal{E}_i(M) = \sum_{v \in S_i} (h_v + w_{v, M}(v))$ .

12 We focus on an arbitrary set  $S_i$ . When  $p_i = 1$ , it trivially holds that  $\mathcal{E}_i(M_{\text{new}}) \geq \mathcal{E}_i(M_{\text{old}})$ . When  
 13  $p_i \geq 2$ , in the following we quantify how much efficiency loss occurs during the swapping.

14 Let us first define the set of  $p_i$  vehicles  $\{v_j\}_{1 \leq j \leq p_i}$  indexed based on the swapping order, such that  
 15  $M_{\text{new}}(v_j) = M_{\text{old}}(v_{j+1}), 1 \leq j < p_i$ . Thus, we have

$$\begin{aligned}
 \mathcal{E}_i(M_{\text{old}}) - \mathcal{E}_i(M_{\text{new}}) &= w_{v_1, M_{\text{old}}}(v_1) - w_{v_{p_i}, M_{\text{new}}}(v_{p_i}) + \sum_{2 \leq j \leq p_i} (w_{v_j, M_{\text{old}}}(v_j) - w_{v_{j-1}, M_{\text{old}}}(v_j)) \\
 &\leq w_{v_0, M_{\text{old}}}(v_0) - w_{v_{p_i-1}, M_{\text{new}}}(v_{p_i-1}) + (p_i - 1)\Delta \\
 &\leq f + (p_i - 1)\Delta
 \end{aligned} \tag{1}$$

16 Next, we know from REASSIGN that every vehicle  $v$  in the swapping chain is reassigned to request  
 17  $M_{\text{fair}}(v)$  in the output assignment  $M_{\text{new}}$ . Thus, we have

$$\mathcal{E}_i(M_{\text{new}}) = \sum_{v \in S_i} (h_v + w_{v, M_{\text{new}}}(v)) \geq \sum_{v \in S_i} \mathcal{F}_{\text{opt}} \geq p_i \mathcal{F}_{\text{opt}}$$

18 This implies

$$\mathcal{E}(M_{\text{new}}) \geq \sum_{1 \leq i \leq |\mathcal{S}|} \mathcal{E}_i(M_{\text{new}}) \geq 2|\mathcal{S}| \cdot \mathcal{F}_{\text{opt}} \Rightarrow |\mathcal{S}| \leq \frac{\mathcal{E}(M_{\text{new}})}{2\mathcal{F}_{\text{opt}}} \tag{2}$$

19 Let us now consider all available vehicles  $v \in \mathcal{V}$ . For simplicity, we define the set of vehicles  
 20  $\mathcal{V}_o = \mathcal{V} \setminus \bigcup_{1 \leq i \leq t} S_i$ . Therefore, from equation (1) and (2), and the fact that for every  $v \in \mathcal{V}_o$ ,

21  $w_{v,M_{\text{new}}}(v) = w_{v,M_{\text{old}}}(v)$ , we have

$$\begin{aligned}
\mathcal{E}(M_{\text{old}}) - \mathcal{E}(M_{\text{new}}) &= \sum_{1 \leq i \leq |\mathcal{S}|} (\mathcal{E}_i(M_{\text{old}}) - \mathcal{E}_i(M_{\text{new}})) \\
&\leq \sum_{1 \leq i \leq |\mathcal{S}|} (f + (p_i - 1)\Delta) \\
&\leq |\mathcal{S}| \cdot f + n\Delta \\
&\leq \frac{f \cdot \mathcal{E}(M_{\text{new}})}{2\mathcal{F}_{\text{opt}}} + n\Delta
\end{aligned}$$

22 Rearrange the terms in the last inequality and we obtain

$$\mathcal{E}(M_{\text{new}}) \geq \frac{2\mathcal{F}_{\text{opt}}}{2\mathcal{F}_{\text{opt}} + f} (\mathcal{E}(M_{\text{old}}) - n\Delta)$$

23 which is exactly what stated in the lemma.  $\square$

### 24 **Proof of Theorem 3.3**

25 *Proof.* For any  $0 \leq \lambda \leq 1$  and  $\alpha > \frac{2}{2+\lambda}$ , consider the following problem instances.

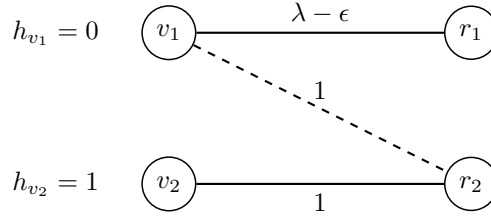

26 Here  $\epsilon$  is set as  $\min\{\frac{1}{2}(2 + \lambda - \frac{2}{\alpha}), \lambda\}$ . Because  $\alpha > \frac{2}{2+\lambda}$ , this guarantees  $\lambda \geq \epsilon > 0$ .

27 Note that this problem instance has  $\Delta = 0$ . There are only two feasible assignments in this instance:

- 28 • the *efficient assignment*  $M_{\text{eff}}$  (marked by solid lines) assigns  $r_1$  to  $v_1$  and  $r_2$  to  $v_2$  and gives  
29  $\mathcal{E}_{\text{opt}} = 2 + \lambda - \epsilon$ ;
- 30 • the *fair assignment*  $M_{\text{fair}}$  (marked by dashed lines) assigns  $r_2$  to  $v_1$  and leaves  $r_1$  unmatched,  
31 and gives  $\mathcal{F}_{\text{opt}} = 1$ .

32 Note that among these two assignments,  $M_{\text{fair}}$  is the only one with fairness value at least  $\lambda$ , and we  
33 have

$$\frac{\mathcal{E}(M_{\text{fair}})}{\mathcal{E}_{\text{opt}} - n\Delta} = \frac{2}{2 + \lambda - \epsilon} < \frac{2}{2 + \lambda - (2 + \lambda - \frac{2}{\alpha})} = \alpha.$$

34 Thus in this problem instance, any assignment that satisfies the fairness requirement stated in the  
35 lemma cannot satisfy the efficiency requirement.  $\square$
